# Supplementary material for: Comparative Analysis of Mitochondrial Genomes in Two Subspecies of the Sunwatcher Toad-Headed Agama (Phrynocephalus helioscopus): Prevalent Intraspecific Gene Rearrangements in Phrynocephalus
Source: MDPI journal article supplement (doi:10.3390/genes13020203), 2022-01-23
Supplement: s1 [file s1]

**Table S1.** *Phrynocephalus* and two outgroup species analyzed in this study with their GenBank accession numbers.

| Taxon                                       | Family   | GenBank accession number | Size (bp) | Reference                            |
|---------------------------------------------|----------|--------------------------|-----------|--------------------------------------|
| <i>Phrynocephalus albolineatus</i>          | Agamidae | KP279760                 | 16,808    | [S1]                                 |
| <i>Phrynocephalus axillaris</i>             | Agamidae | KC119493                 | 17,937    | [S2]                                 |
| <i>Phrynocephalus axillaris</i>             | Agamidae | MK284224                 | 15,883    | [S3]                                 |
| <i>Phrynocephalus erythrurus erythrurus</i> | Agamidae | MF039065                 | 16,456    | [S4]                                 |
| <i>Phrynocephalus erythrurus parva</i>      | Agamidae | KJ630904                 | 16,379    | [S5]                                 |
| <i>Phrynocephalus forsythii</i>             | Agamidae | KP126516                 | 17,542    | [S6]                                 |
| <i>Phrynocephalus forsythii</i>             | Agamidae | KP232959                 | 16,143    | [S7]                                 |
| <i>Phrynocephalus forsythii</i>             | Agamidae | MK284225                 | 16,060    | [S8]                                 |
| <i>Phrynocephalus frontalis</i>             | Agamidae | MF039064                 | 17,041    | [S4]                                 |
| <i>Phrynocephalus grumgrzimailoi</i>        | Agamidae | KM093859                 | 16,301    | [S9]                                 |
| <i>Phrynocephalus guinanensis</i>           | Agamidae | KJ885621                 | 16,279    | [S10]                                |
| <i>Phrynocephalus helioscopus cameranoi</i> | Agamidae | OL493804                 | 17,102    | This study                           |
| <i>Phrynocephalus helioscopus varius I</i>  | Agamidae | KM093858                 | 16,249    | [S11]                                |
| <i>Phrynocephalus helioscopus varius II</i> | Agamidae | OL493803                 | 17,253    | This study                           |
| <i>Phrynocephalus mystaceus</i>             | Agamidae | KC578685                 | 16,660    | [S12]                                |
| <i>Phrynocephalus przewalskii</i>           | Agamidae | KF572032                 | 16,892    | [S13]                                |
| <i>Phrynocephalus putjatai</i>              | Agamidae | KJ830752                 | 16,283    | [S14]                                |
| <i>Phrynocephalus theobaldi orientalis</i>  | Agamidae | KJ551842                 | 16,608    | [S15]                                |
| <i>Phrynocephalus theobaldi orientalis</i>  | Agamidae | MF039062                 | 17,129    | [S4]                                 |
| <i>Phrynocephalus theobaldi theobaldi</i>   | Agamidae | MF039063                 | 16,365    | [S4]                                 |
| <i>Phrynocephalus versicolor</i>            | Agamidae | KJ749841                 | 16,429    | [S16]                                |
| <i>Phrynocephalus vlangelii nanschanica</i> | Agamidae | MF039061                 | 15,251    | [S4]                                 |
| <i>Phrynocephalus vlangelii pylzowi</i>     | Agamidae | MF039059                 | 16,442    | [S4]                                 |
| <i>Phrynocephalus vlangelii pylzowi</i>     | Agamidae | MF039060                 | 16,725    | [S4]                                 |
| <i>Phrynocephalus vlangelii vlangelii</i>   | Agamidae | MF039058                 | 16,319    | [S4]                                 |
| <i>Pseudotrapelus sinaitus</i>              | Agamidae | AB262447                 | 16,560    | Amer and Kumazawa (Unpublished data) |
| <i>Xenagama taylori</i>                     | Agamidae | DQ008215                 | 16,220    | [S17]                                |

## References in supporting materials

- S1. Shao, M.; Ma, L.; Zhang, G.; Wang, Z. The complete mitochondrial genome of the toad-headed lizard, *Phrynocephalus albolineatus* (Reptilia, Squamata, Agamidae). *Mitochondrial DNA Part A* **2015**, *28*, 137–138.
- S2. Li, J.; Guo, X.; Chen, D.; Wang, Y. The complete mitochondrial genome of the Yarkand toad-headed agama, *Phrynocephalus axillaris* (Reptilia, Squamata, Agamidae). *Mitochondrial DNA* **2013**, *24*, 234–236.
- S3. Chen, D.; Guo, X. Next-generation sequencing yields a nearly complete mitochondrial genome of the Yarkand toad-headed agama (*Phrynocephalus axillaris*) from the Turpan Depression. *Mitochondrial DNA Part B* **2019**, *4*, 1198–1199.
- S4. Jin, Y.; Brown, R. Partition number, rate priors and unreliable divergence times in Bayesian phylogenetic dating. *Cladistics* **2017**, *34*, 568–573.
- S5. Zhu, L.; Liao, P.; Tong, H.; Jin, Y. The complete mitochondrial genome of the subspecies, *Phrynocephalus erythrurus parva* (Reptilia, Squamata, Agamidae), a toad-headed lizard dwell at highest elevations of any reptile in the world. *Mitochondrial DNA Part A* **2014**, *27*, 703–704.
- S6. Chen, D.; Zhou, T.; Guo, X. The complete mitochondrial genome of *Phrynocephalus forsythii* (Reptilia, Squamata, Agamidae), a toad-headed agama endemic to the Taklamakan Desert. *Mitochondrial DNA Part A* **2015**, *27*, 4046–4048.

- S7. Shao, M.; Ma, L.; Wang, Z. The complete mitochondrial genome of the toad-headed lizard, *Phrynocephalus forsythii* (Reptilia, Squamata, Agamidae). *Mitochondrial DNA Part A* **2016**, *27*, 3147–3148.
- S8. Chen, D.; Li, J.; Guo, X. Next-generation sequencing yields a nearly complete mitochondrial genome of the Forsyth's toad-headed agama, *Phrynocephalus forsythii* (Reptilia, Squamata, Agamidae). *Mitochondrial DNA Part B* **2019**, *4*, 817–819.
- S9. Luo, S.; Liu, L.; Song, S. The complete mitochondrial genome of Grumgrizimailo's toad-headed agama, *Phrynocephalus grumgrizimailoi* (Reptilia, Squamata, Agamidae). *Mitochondrial DNA Part A* **2014**, *27*, 1581–1582.
- S10. Fu, C.; Chen, W.; Jin, Y. The complete mitochondrial genome of *Phrynocephalus guinanensis* (Reptilia, Squamata, Agamidae). *Mitochondrial DNA Part A* **2014**, *27*, 1103–1104.
- S11. Li, D.; Guo, J.; Zhou, X.; Chang, C.; Zhang, S. The complete mitochondrial genome of *Phrynocephalus helioscopus* (Reptilia, Squamata, Agamidae). *Mitochondrial DNA Part A* **2014**, *27*, 1846–1847.
- S12. Chen, D.; Guo, X.; Li, J. The complete mitochondrial genome of secret toad-headed agama, *Phrynocephalus mystaceus* (Reptilia, Squamata, Agamidae). *Mitochondrial DNA* **2014**, *25*, 19–20.
- S13. Li, D.; Song, S.; Chen, T.; Zhang, C.; Chang, C. Complete mitochondrial genome of the desert toad-headed agama, *Phrynocephalus przewalskii* (Reptilia, Squamata, Agamidae), a novel gene organization in vertebrate mtDNA. *Mitochondrial DNA* **2013**, *26*, 696–697.
- S14. Tong, H.; Jin, Y. The complete mitochondrial genome of an agama, *Phrynocephalus putjatia* (Reptilia, Squamata, Agamidae). *Mitochondrial DNA Part A* **2014**, *27*, 1028–1029.
- S15. Liao, P.; Jin, Y. The complete mitochondrial genome of the toad-headed lizard subspecies, *Phrynocephalus theobaldi orientalis* (Reptilia, Squamata, Agamidae). *Mitochondrial DNA Part A* **2014**, *27*, 559–560.
- S16. Song, S.; Li, D.; Zhang, C.; Jiang, K.; Zhang, D.; Chang, C. The complete mitochondrial genome of the color changeable toad-headed agama, *Phrynocephalus versicolor* (Reptilia, Squamata, Agamidae). *Mitochondrial DNA* **2014**, *27*, 1121–1122.
- S17. Macey, J.R.; Schulte, J.A.; Fong, J.J.; Das, I.; Papenfuss, T.J. The complete mitochondrial genome of an agamid lizard from the Afro-Asian subfamily agaminae and the phylogenetic position of *Bufo* and *Xenagama*. *Mol. Phylogenet. Evol.* **2006**, *39*, 881–886.
