# Supplementary material for: Comparative Analysis of Mitochondrial Genomes in Two Subspecies of the Sunwatcher Toad-Headed Agama (Phrynocephalus helioscopus): Prevalent Intraspecific Gene Rearrangements in Phrynocephalus
Source: MDPI journal article supplement (doi:10.3390/genes13020203), 2022-01-23
Supplement: s1 [file s1]

**Table S4.** Comparison of the composition and skew values of three mitogenomes for *P. helioscopus*.

| Element    | T    |      |      | C    |      |      | A    |      |      | G    |      |      | Length (bp) |        |        | A+T% |      |      | G+C% |      |      | AT-skew |        |        | GC-skew |        |        |
|------------|------|------|------|------|------|------|------|------|------|------|------|------|-------------|--------|--------|------|------|------|------|------|------|---------|--------|--------|---------|--------|--------|
|            | I    | II   | III  | I           | II     | III    | I    | II   | III  | I    | II   | III  | I       | II     | III    | I       | II     | III    |
| Mitogenome | 26.4 | 26.7 | 26.4 | 25.2 | 25.1 | 25.2 | 35.9 | 35.7 | 35.9 | 12.5 | 12.5 | 12.5 | 16,249      | 17,253 | 17,102 | 62.3 | 62.4 | 62.3 | 37.7 | 37.6 | 37.7 | 0.152   | 0.144  | 0.152  | -0.337  | -0.335 | -0.337 |
| PGCs       | 28.0 | 28.0 | 28.1 | 25.0 | 25.0 | 24.9 | 34.7 | 34.8 | 34.8 | 12.2 | 12.1 | 12.3 | 11,249      | 11,252 | 11,246 | 62.7 | 62.8 | 62.9 | 37.2 | 37.1 | 37.2 | 0.107   | 0.108  | 0.107  | -0.344  | -0.348 | -0.339 |
| tRNAs      | 25.3 | 28.8 | 29.0 | 23.0 | 19.1 | 18.8 | 36.0 | 32.6 | 32.4 | 15.8 | 19.6 | 19.9 | 1428        | 1542   | 1546   | 61.3 | 61.4 | 61.4 | 38.8 | 38.7 | 38.7 | 0.175   | 0.062  | 0.055  | -0.186  | 0.013  | 0.028  |
| rRNAs      | 22.3 | 22.1 | 21.5 | 23.1 | 23.3 | 23.7 | 37.4 | 37.6 | 37.8 | 17.2 | 17.0 | 17.1 | 2349        | 2352   | 2352   | 59.7 | 59.7 | 59.3 | 40.3 | 40.3 | 40.8 | 0.253   | 0.260  | 0.275  | -0.146  | -0.156 | -0.162 |
| CR I       | 32.3 | 31.2 | 33.2 | 24.1 | 24.7 | 24.7 | 31.2 | 31.1 | 31.9 | 12.4 | 12.5 | 12.1 | 892         | 893    | 889    | 63.5 | 62.3 | 65.1 | 36.5 | 37.2 | 36.8 | -0.328  | -0.020 | -0.017 | -0.002  | -0.342 | -0.321 |
| CR II      | 36.2 | 31.4 | 34.5 | 20.1 | 24.6 | 24.6 | 34.1 | 31.2 | 31.8 | 9.6  | 12.8 | 12.3 | 334         | 804    | 806    | 70.3 | 56   | 66.3 | 29.7 | 37.4 | 36.9 | -0.316  | -0.041 | -0.030 | -0.004  | -0.333 | -0.354 |
| CR III     | —    | 35.7 | 33.6 | —    | 17.3 | 17.3 | —    | 32.1 | 37.9 | —    | 12.9 | 9.2  | —           | 417    | 272    | —    | 67.8 | 71.5 | —    | 30.2 | 26.5 | —       | -0.053 | 0.060  | —       | -0.146 | -0.306 |

Note: I stands for *P. helioscopus varius* I; II stands for *P. helioscopus varius* II; III stands for *P. helioscopus cameranoi*.
