# Supplementary material for: Comparative Analysis of Mitochondrial Genomes in Two Subspecies of the Sunwatcher Toad-Headed Agama (Phrynocephalus helioscopus): Prevalent Intraspecific Gene Rearrangements in Phrynocephalus
Source: MDPI journal article supplement (doi:10.3390/genes13020203), 2022-01-23
Supplement: s1 [file s1]

**Table S5.** Comparison of the codon usage in mitochondrial protein-coding genes for *P.**helioscopus varius* I, *P. helioscopus varius* II and *P. helioscopus cameranoi*.

| Codon   | <i>P. helioscopus varius</i> I |      | <i>P. helioscopus varius</i> II |      | <i>P. helioscopus cameranoi</i> |      |
|---------|--------------------------------|------|---------------------------------|------|---------------------------------|------|
|         | Count                          | RSCU | Count                           | RSCU | Count                           | RSCU |
| UUU (F) | 128                            | 1.17 | 129                             | 1.18 | 132                             | 1.22 |
| UUC (F) | 90                             | 0.83 | 89                              | 0.82 | 84                              | 0.78 |
| UUA (L) | 155                            | 1.69 | 153                             | 1.67 | 171                             | 1.86 |
| UUG (L) | 35                             | 0.38 | 36                              | 0.39 | 25                              | 0.27 |
| CUU (L) | 77                             | 0.84 | 75                              | 0.82 | 72                              | 0.78 |
| CUC (L) | 41                             | 0.45 | 45                              | 0.49 | 49                              | 0.53 |
| CUA (L) | 206                            | 2.24 | 213                             | 2.32 | 198                             | 2.16 |
| CUG (L) | 37                             | 0.4  | 28                              | 0.31 | 36                              | 0.39 |
| AUU (I) | 206                            | 1.21 | 210                             | 1.24 | 209                             | 1.24 |
| AUC (I) | 135                            | 0.79 | 128                             | 0.76 | 127                             | 0.76 |
| AUA (M) | 253                            | 1.73 | 257                             | 1.73 | 244                             | 1.68 |
| AUG (M) | 40                             | 0.27 | 40                              | 0.27 | 46                              | 0.32 |
| GUU (V) | 30                             | 0.91 | 33                              | 0.99 | 30                              | 0.93 |
| GUC (V) | 21                             | 0.64 | 20                              | 0.6  | 17                              | 0.53 |
| GUA (V) | 64                             | 1.94 | 64                              | 1.92 | 67                              | 2.08 |
| GUG (V) | 17                             | 0.52 | 16                              | 0.48 | 15                              | 0.47 |
| UCU (S) | 26                             | 0.6  | 27                              | 0.63 | 25                              | 0.58 |
| UCC (S) | 46                             | 1.07 | 45                              | 1.05 | 43                              | 0.99 |
| UCA (S) | 133                            | 3.08 | 135                             | 3.15 | 134                             | 3.09 |
| UCG (S) | 9                              | 0.21 | 7                               | 0.16 | 9                               | 0.21 |
| CCU (P) | 19                             | 0.41 | 18                              | 0.39 | 20                              | 0.43 |
| CCC (P) | 33                             | 0.71 | 35                              | 0.76 | 29                              | 0.63 |
| CCA (P) | 122                            | 2.64 | 121                             | 2.62 | 125                             | 2.72 |
| CCG (P) | 11                             | 0.24 | 11                              | 0.24 | 10                              | 0.22 |
| ACU (T) | 43                             | 0.44 | 41                              | 0.41 | 43                              | 0.42 |
| ACC (T) | 122                            | 1.24 | 127                             | 1.28 | 130                             | 1.28 |
| ACA (T) | 222                            | 2.25 | 223                             | 2.24 | 229                             | 2.25 |
| ACG (T) | 7                              | 0.07 | 7                               | 0.07 | 5                               | 0.05 |
| GCU (A) | 33                             | 0.53 | 30                              | 0.49 | 35                              | 0.55 |
| GCC (A) | 103                            | 1.66 | 104                             | 1.7  | 105                             | 1.66 |
| GCA (A) | 109                            | 1.76 | 106                             | 1.74 | 107                             | 1.69 |
| GCG (A) | 3                              | 0.05 | 4                               | 0.07 | 6                               | 0.09 |
| UAU (Y) | 42                             | 0.76 | 40                              | 0.72 | 51                              | 0.91 |
| UAC (Y) | 69                             | 1.24 | 71                              | 1.28 | 61                              | 1.09 |
| UAA (*) | 3                              | 1.5  | 3                               | 1.5  | 3                               | 1.5  |
| UAG (*) | 2                              | 1    | 2                               | 1    | 2                               | 1    |
| CAU (H) | 27                             | 0.64 | 27                              | 0.64 | 26                              | 0.62 |
| CAC (H) | 58                             | 1.36 | 58                              | 1.36 | 58                              | 1.38 |
| CAA (Q) | 109                            | 1.95 | 108                             | 1.93 | 105                             | 1.89 |

|         |     |      |     |      |     |      |
|---------|-----|------|-----|------|-----|------|
| CAG (Q) | 3   | 0.05 | 4   | 0.07 | 6   | 0.11 |
| AAU (N) | 48  | 0.6  | 48  | 0.6  | 42  | 0.55 |
| AAC (N) | 111 | 1.4  | 113 | 1.4  | 112 | 1.45 |
| AAA (K) | 121 | 1.86 | 120 | 1.86 | 123 | 1.89 |
| AAG (K) | 9   | 0.14 | 9   | 0.14 | 7   | 0.11 |
| GAU (D) | 10  | 0.36 | 12  | 0.44 | 18  | 0.65 |
| GAC (D) | 45  | 1.64 | 43  | 1.56 | 37  | 1.35 |
| GAA (E) | 77  | 1.86 | 77  | 1.83 | 74  | 1.76 |
| GAG (E) | 6   | 0.14 | 7   | 0.17 | 10  | 0.24 |
| UGU (C) | 16  | 1.23 | 17  | 1.31 | 16  | 1.19 |
| UGC (C) | 10  | 0.77 | 9   | 0.69 | 11  | 0.81 |
| UGA (W) | 90  | 1.89 | 87  | 1.83 | 87  | 1.81 |
| UGG (W) | 5   | 0.11 | 8   | 0.17 | 9   | 0.19 |
| CGU (R) | 7   | 0.46 | 7   | 0.46 | 6   | 0.39 |
| CGC (R) | 5   | 0.33 | 5   | 0.33 | 7   | 0.46 |
| CGA (R) | 48  | 3.15 | 48  | 3.15 | 47  | 3.08 |
| CGG (R) | 1   | 0.07 | 1   | 0.07 | 1   | 0.07 |
| AGU (S) | 18  | 0.42 | 17  | 0.4  | 19  | 0.44 |
| AGC (S) | 27  | 0.63 | 26  | 0.61 | 30  | 0.69 |
| AGA (*) | 2   | 1    | 2   | 1    | 2   | 1    |
| AGG (*) | 1   | 0.5  | 1   | 0.5  | 1   | 0.5  |
| GGU (G) | 20  | 0.4  | 23  | 0.46 | 22  | 0.44 |
| GGC (G) | 55  | 1.09 | 54  | 1.07 | 48  | 0.96 |
| GGA (G) | 89  | 1.76 | 90  | 1.78 | 89  | 1.79 |
| GGG (G) | 38  | 0.75 | 35  | 0.69 | 40  | 0.8  |
