# Supplementary material for: Comparative Analysis of Mitochondrial Genomes in Two Subspecies of the Sunwatcher Toad-Headed Agama (Phrynocephalus helioscopus): Prevalent Intraspecific Gene Rearrangements in Phrynocephalus
Source: MDPI journal article supplement (doi:10.3390/genes13020203), 2022-01-23
Supplement: s1 [file s1]

**Table S3.** Characteristics of the three mitogenomes of *P. helioscopus*(a) *P. helioscopus varius* I

| Gene/Element         | From  | To             | Antico<br>don | Length<br>(bp) | Codon |     | Spacer<br>(+)/Overlap | Strand |
|----------------------|-------|----------------|---------------|----------------|-------|-----|-----------------------|--------|
|                      |       |                |               |                | Star  | Sto |                       |        |
| <i>tRNA-Phe</i>      | 1     | 68             | GAA           | 68             |       |     |                       | H      |
| <i>tRNA-Pro</i>      | 72    | 87(incomplete) |               |                |       |     |                       | L      |
| <i>CRII</i>          | 88    | 421            |               |                |       |     |                       |        |
| <i>12S rRNA</i>      | 422   | 1287           |               | 865            |       |     |                       | H      |
| <i>tRNA-Val</i>      | 1285  | 1348           | CAC           | 64             |       |     | -3                    | H      |
| <i>16S rRNA</i>      | 1349  | 2832           |               | 1484           |       |     |                       | H      |
| <i>tRNA-Leu</i>      | 2836  | 2909           | TAA           | 74             |       |     | +3                    | H      |
| <i>ND1</i>           | 2907  | 3875           |               | 969            | AT    | TA  | -3                    | H      |
| <i>tRNA-Gln</i>      | 3872  | 3943           | TTG           | 72             |       |     | -4                    | L      |
| <i>tRNA-Ile</i>      | 3952  | 4019           | GAT           | 68             |       |     | +8                    | H      |
| <i>tRNA-Met</i>      | 4020  | 4082           | CAT           | 63             |       |     |                       | H      |
| <i>ND2</i>           | 4084  | 5118           |               | 1035           | AT    | AG  | +1                    | H      |
| <i>tRNA-Trp</i>      | 5118  | 5188           | TCA           | 71             |       |     | -1                    | H      |
| <i>tRNA-Ala</i>      | 5189  | 5257           | TGC           | 69             |       |     |                       | L      |
| <i>tRNA-Asn</i>      | 5258  | 5329           | GTT           | 72             |       |     |                       | L      |
| <i>tRNA-Cys</i>      | 5346  | 5406           | GCA           | 61             |       |     | +16                   | L      |
| <i>tRNA-Tyr</i>      | 5407  | 5473           | GTA           | 67             |       |     |                       | L      |
| <i>COX1</i>          | 5474  | 7021           |               | 1548           | AT    | AG  |                       | H      |
| <i>tRNA-</i>         | 7013  | 7082           | TGA           | 70             |       |     | -9                    | L      |
| <i>tRNA-Asp</i>      | 7086  | 7154           | GTC           | 69             |       |     | +3                    | H      |
| <i>COX2</i>          | 7155  | 7839           |               | 685            | AT    | T   |                       | H      |
| <i>tRNA-Lys</i>      | 7840  | 7902           | TTT           | 63             |       |     |                       | H      |
| <i>ATP8</i>          | 7903  | 8061           |               | 159            | GT    | TA  |                       | H      |
| <i>ATP6</i>          | 8055  | 8736           |               | 682            | AT    | T   | -7                    | H      |
| <i>COX3</i>          | 8737  | 9520           |               | 784            | AT    | T   |                       | H      |
| <i>tRNA-Gly</i>      | 9521  | 9585           | TCC           | 65             |       |     |                       | H      |
| <i>ND3</i>           | 9586  | 9925           |               | 340            | AT    | T   |                       | H      |
| <i>tRNA-Arg</i>      | 9926  | 9993           | TCG           | 68             |       |     |                       | H      |
| <i>ND4L</i>          | 9994  | 10,284         |               | 291            | GT    | TA  |                       | H      |
| <i>ND4</i>           | 10,27 | 11,642         |               | 1365           | AT    | TA  | -7                    | H      |
| <i>tRNA-His</i>      | 11,64 | 11,706         | GTG           | 63             |       |     | +1                    | H      |
| <i>tRNA-Ser(AGY)</i> | 11,70 | 11,767         | GCT           | 61             |       |     |                       | H      |
| <i>tRNA-</i>         | 11,76 | 11,838         | TAG           | 71             |       |     |                       | H      |
| <i>ND5</i>           | 11,84 | 13,609         |               | 1770           | AT    | TA  | +1                    | H      |
| <i>ND6</i>           | 13,59 | 14,079         |               | 483            | GT    | AG  | -13                   | L      |
| <i>tRNA-Glu</i>      | 14,08 | 14,148         | TTC           | 69             |       |     |                       | L      |
| <i>Cytb</i>          | 14,15 | 15,293         |               | 1141           | AT    | T   | +4                    | H      |
| <i>tRNA-Thr</i>      | 15,29 | 15,357         | TGT           | 64             |       |     |                       | H      |
| <i>CRI</i>           | 15,35 | 16,294         |               | 937            |       |     |                       |        |

(b) *P. helioscopus varous* II

| Gene/Element          | From  | To     | Anticodon | Length<br>(bp) | Codon |      | Spacer (+)/<br>Overlap (-) | Strand |
|-----------------------|-------|--------|-----------|----------------|-------|------|----------------------------|--------|
|                       |       |        |           |                | Start | Stop |                            |        |
| <i>tRNA-Phe</i>       | 1     | 68     | GAA       | 68             |       |      |                            | H      |
| <i>tRNA-Pro</i>       | 72    | 133    | TGG       | 62             |       |      | +3                         | L      |
| <i>CRII</i>           | 134   | 937    |           | 804            |       |      |                            |        |
| <i>tRNA-Phe</i>       | 938   | 1005   | GAA       | 68             |       |      |                            | H      |
| <i>CRIII</i>          | 1006  | 1422   |           | 417            |       |      |                            |        |
| <i>12S rRNA</i>       | 1423  | 2289   |           | 867            |       |      |                            | H      |
| <i>tRNA-Val</i>       | 2287  | 2350   | CAC       | 64             |       |      | -3                         | H      |
| <i>16S rRNA</i>       | 2351  | 3835   |           | 1485           |       |      |                            | H      |
| <i>tRNA-Leu (UUR)</i> | 3839  | 3912   | TAA       | 74             |       |      | +3                         | H      |
| <i>ND1</i>            | 3910  | 4878   |           | 969            | AT    | TAG  | -3                         | H      |
| <i>tRNA-Gln</i>       | 4875  | 4946   | TTG       | 72             |       |      | -4                         | L      |
| <i>tRNA-Ile</i>       | 4955  | 5022   | GAT       | 68             |       |      | +8                         | H      |
| <i>tRNA-Met</i>       | 5023  | 5085   | CAT       | 63             |       |      |                            | H      |
| <i>ND2</i>            | 5087  | 6121   |           | 1035           | AT    | AGA  | +1                         | H      |
| <i>tRNA-Trp</i>       | 6121  | 6191   | TCA       | 71             |       |      | -1                         | H      |
| <i>tRNA-Ala</i>       | 6192  | 6260   | TGC       | 69             |       |      |                            | L      |
| <i>tRNA-Asn</i>       | 6261  | 6332   | GTT       | 72             |       |      |                            | L      |
| <i>tRNA-Cys</i>       | 6349  | 6409   | GCA       | 61             |       |      | +16                        | L      |
| <i>tRNA-Tyr</i>       | 6410  | 6476   | GTA       | 67             |       |      |                            | L      |
| <i>COX1</i>           | 6477  | 8024   |           | 1548           | AT    | AGA  |                            | H      |
| <i>tRNA-Ser(UCN)</i>  | 8016  | 8085   | TGA       | 70             |       |      | -9                         | L      |
| <i>tRNA-Asp</i>       | 8089  | 8157   | GTC       | 69             |       |      | +3                         | H      |
| <i>COX2</i>           | 8158  | 8842   |           | 685            | AT    | T    |                            | H      |
| <i>tRNA-Lys</i>       | 8843  | 8905   | TTT       | 63             |       |      |                            | H      |
| <i>ATP8</i>           | 8906  | 9064   |           | 159            | GT    | TAA  |                            | H      |
| <i>ATP6</i>           | 9058  | 9739   |           | 682            | AT    | T    | -7                         | H      |
| <i>COX3</i>           | 9740  | 10,523 |           | 784            | AT    | T    |                            | H      |
| <i>tRNA-Gly</i>       | 10,52 | 10,588 | TCC       | 65             |       |      |                            | H      |
| <i>ND3</i>            | 10,58 | 10,928 |           | 340            | ATT   | T    |                            | H      |
| <i>tRNA-Arg</i>       | 10,92 | 10,996 | TCG       | 68             |       |      |                            | H      |
| <i>ND4L</i>           | 10,99 | 11,287 |           | 291            | GT    | TAA  |                            | H      |
| <i>ND4</i>            | 11,28 | 12,645 |           | 1365           | AT    | TAA  | -7                         | H      |
| <i>tRNA-His</i>       | 12,64 | 12,709 | GTG       | 63             |       |      | +1                         | H      |
| <i>tRNA-Ser(AGY)</i>  | 12,71 | 12,770 | GCT       | 61             |       |      |                            | H      |
| <i>tRNA-</i>          | 12,77 | 12,841 | TAG       | 71             |       |      |                            | H      |
| <i>ND5</i>            | 12,84 | 14,612 |           | 1770           | AT    | TAG  | +1                         | H      |
| <i>ND6</i>            | 14,60 | 15,082 |           | 483            | GT    | AGG  | -13                        | L      |
| <i>tRNA-Glu</i>       | 15,08 | 15,151 | TTC       | 69             |       |      |                            | L      |
| <i>Cytb</i>           | 15,15 | 16,296 |           | 1141           | AT    | T    | +4                         | H      |
| <i>tRNA-Thr</i>       | 16,29 | 16,360 | TGT       | 64             |       |      |                            | H      |
| <i>CRI</i>            | 16,36 | 17,253 |           | 893            |       |      |                            |        |

(c) *P. helioscopus cameranoi*

| Gene/Element     | From   | To     | Anticodon | Length<br>(bp) | Codon |      | Spacer<br>(+)/Overlap (-) | Strand |
|------------------|--------|--------|-----------|----------------|-------|------|---------------------------|--------|
|                  |        |        |           |                | Start | Stop |                           |        |
| <i>tRNA-Phe</i>  | 1      | 66     | GAA       | 66             |       |      |                           | H      |
| <i>tRNA-Pro</i>  | 70     | 131    | TGG       | 62             |       |      | +3                        | L      |
| <i>CRII</i>      | 132    | 937    |           | 806            |       |      |                           |        |
| <i>tRNA-Phe</i>  | 938    | 1009   | GAA       | 72             |       |      |                           | H      |
| <i>CRIII</i>     | 1010   | 1281   |           | 272            |       |      |                           |        |
| <i>12S rRNA</i>  | 1282   | 2149   |           | 868            |       |      |                           | H      |
| <i>tRNA-Val</i>  | 2147   | 2210   | TAC       | 64             |       |      | -3                        | H      |
| <i>16S rRNA</i>  | 2211   | 3694   |           | 1484           |       |      |                           | H      |
| <i>tRNA-Leu</i>  | 3698   | 3771   | TAA       | 74             |       |      | +3                        | H      |
| <i>ND1</i>       | 3769   | 4737   |           | 969            | ATA   | TAG  | -3                        | H      |
| <i>tRNA- Gln</i> | 4734   | 4805   | TTG       | 72             |       |      | -4                        | L      |
| <i>tRNA- Ile</i> | 4814   | 4882   | GAT       | 69             |       |      | +8                        | H      |
| <i>tRNA-Met</i>  | 4883   | 4945   | CAT       | 63             |       |      |                           | H      |
| <i>ND2</i>       | 4947   | 5981   |           | 1035           | ATT   | AGA  | +1                        | H      |
| <i>tRNA-Trp</i>  | 5981   | 6050   | TCA       | 70             |       |      | -1                        | H      |
| <i>tRNA-Ala</i>  | 6051   | 6119   | TGC       | 69             |       |      |                           | L      |
| <i>tRNA-Asn</i>  | 6120   | 6191   | GTT       | 72             |       |      |                           | L      |
| <i>tRNA-Cys</i>  | 6206   | 6268   | GCA       | 63             |       |      | +14                       | L      |
| <i>tRNA-Tyr</i>  | 6269   | 6335   | GTA       | 67             |       |      |                           | L      |
| <i>COX1</i>      | 6336   | 7883   |           | 1548           | ATG   | AGA  |                           | H      |
| <i>tRNA-</i>     | 7875   | 7944   | TGA       | 70             |       |      | -9                        | L      |
| <i>tRNA-Asp</i>  | 7948   | 8017   | GTC       | 70             |       |      | +3                        | H      |
| <i>COX2</i>      | 8018   | 8702   |           | 685            | ATG   | T    |                           | H      |
| <i>tRNA-Lys</i>  | 8703   | 8765   | TTT       | 63             |       |      |                           | H      |
| <i>ATP8</i>      | 8766   | 8924   |           | 159            | GTG   | TAA  |                           | H      |
| <i>ATP6</i>      | 8918   | 9599   |           | 682            | ATG   | T    | -7                        | H      |
| <i>COX3</i>      | 9600   | 10,383 |           | 784            | ATG   | T    |                           | H      |
| <i>tRNA-Gly</i>  | 10,384 | 10,448 | TCC       | 65             |       |      |                           | H      |
| <i>ND3</i>       | 10,449 | 10,788 |           | 340            | ATT   | T    |                           | H      |
| <i>tRNA-Arg</i>  | 10,789 | 10,856 | TCG       | 68             |       |      |                           | H      |
| <i>ND4L</i>      | 10,857 | 11,147 |           | 291            | GTG   | TAA  |                           | H      |
| <i>ND4</i>       | 11,141 | 12,505 |           | 1365           | ATG   | TAA  | -7                        | H      |
| <i>tRNA-His</i>  | 12,507 | 12,569 | GTG       | 63             |       |      | +1                        | H      |
| <i>tRNA-</i>     | 12,570 | 12,629 | GCT       | 60             |       |      |                           | H      |
| <i>tRNA-</i>     | 12,630 | 12,700 | TAG       | 71             |       |      |                           | H      |
| <i>ND5</i>       | 12,702 | 14,465 |           | 1764           | ATG   | TAG  | +1                        | H      |
| <i>ND6</i>       | 14,453 | 14,935 |           | 483            | GTG   | AGG  | -13                       | L      |
| <i>tRNA-Glu</i>  | 14,936 | 15,004 | TTC       | 69             |       |      |                           | L      |
| <i>Cytb</i>      | 15,009 | 16,149 |           | 1141           | ATG   | T    | +4                        | H      |
| <i>tRNA-Thr</i>  | 16,150 | 16,213 | TGT       | 64             |       |      |                           | H      |
| <i>CRI</i>       | 16,214 | 17,102 |           | 889            |       |      |                           |        |
