# Supplementary material for: Comparative Analysis of Mitochondrial Genomes in Two Subspecies of the Sunwatcher Toad-Headed Agama (Phrynocephalus helioscopus): Prevalent Intraspecific Gene Rearrangements in Phrynocephalus
Source: MDPI journal article supplement (doi:10.3390/genes13020203), 2022-01-23
Supplement: s1 [file s1]

**Table S6.** Twenty-five *Phrynocephalus* mitogenomes analyzed in gene rearrangement with their GenBank accession numbers.

| Taxon                           | GenBank accession number | Size (bp) | Rearrangement type |
|---------------------------------|--------------------------|-----------|--------------------|
| <i>P. albolineatus</i>          | KP279760                 | 16,808    | V                  |
| <i>P. axillaris</i>             | KC119493                 | 17,937    | V                  |
| <i>P. axillaris</i>             | MK284224                 | 15,883    | V                  |
| <i>P. erythrurus erythrurus</i> | MF039065                 | 16,456    | V                  |
| <i>P. erythrurus parva</i>      | KJ630904                 | 16,379    | VI                 |
| <i>P. forsythii</i>             | KP232959                 | 16,143    | V                  |
| <i>P. forsythii</i>             | KP126516                 | 17,542    | VII                |
| <i>P. forsythii</i>             | MK284225                 | 16,060    | VII                |
| <i>P. frontalis</i>             | MF039064                 | 17,041    | X                  |
| <i>P. grumgrzimaloi</i>         | KM093859                 | 16,301    | V                  |
| <i>P. guinanensis</i>           | KJ885621                 | 16,279    | V                  |
| <i>P. helioscopus varius I</i>  | KM093858                 | 16,249    | V                  |
| <i>P. helioscopus varius II</i> | OL493803                 | 17,253    | IX                 |
| <i>P. helioscopus cameranoi</i> | OL493804                 | 17,102    | IX                 |
| <i>P. mystaceus</i>             | KC578685                 | 16,660    | V                  |
| <i>P. przewalskii</i>           | KF572032                 | 16,892    | VIII               |
| <i>P. putjatai</i>              | KJ830752                 | 16,283    | V                  |
| <i>P. theobaldi orientalis</i>  | KJ551842                 | 16,608    | VII                |
| <i>P. theobaldi orientalis</i>  | MF039062                 | 17,129    | VII                |
| <i>P. theobaldi theobaldi</i>   | MF039063                 | 16,365    | VII                |
| <i>P. versicolor</i>            | KJ749841                 | 16,429    | IX                 |
| <i>P. vlangalii vlangalii</i>   | MF039058                 | 16,319    | V                  |
| <i>P. vlangalii pylzowi</i>     | MF039059                 | 16,442    | V                  |
| <i>P. vlangalii pylzowi</i>     | MF039060                 | 16,725    | V                  |
| <i>P. vlangalii nanschanica</i> | MF039061                 | 15,251    | VI                 |

Note: the rearrangement type (V-IX) followed Liu et al. [18]; a novel rearrangement type was identified and numbered as X.
