# Supplementary figures and images for: Comparative Analysis of Mitochondrial Genomes in Two Subspecies of the Sunwatcher Toad-Headed Agama (Phrynocephalus helioscopus): Prevalent Intraspecific Gene Rearrangements in Phrynocephalus
Source: MDPI journal article supplement (doi:10.3390/genes13020203), 2022-01-23

# (a) *P. helioscopus varius* I

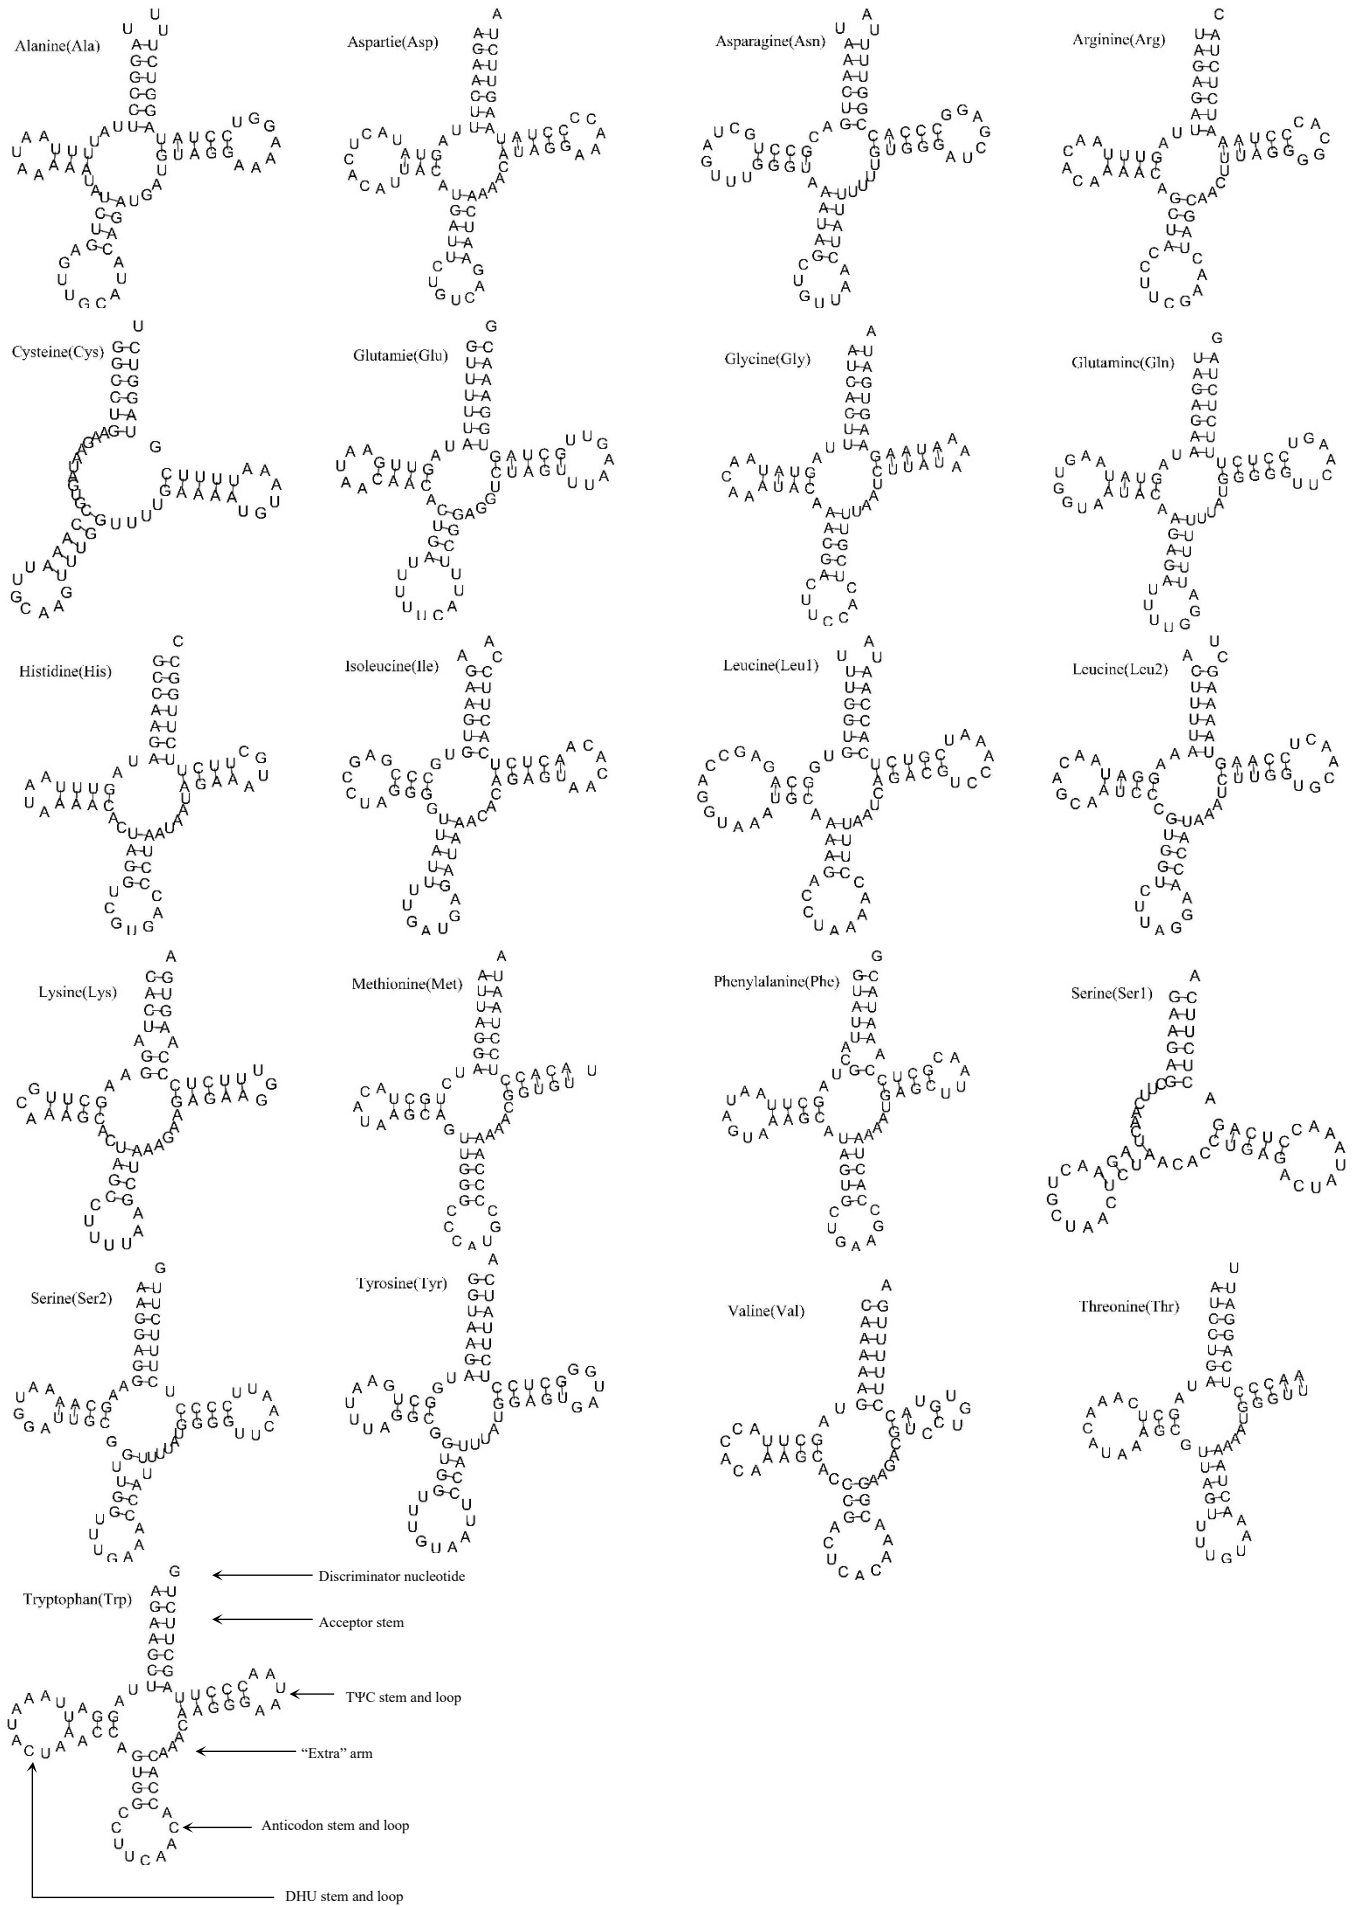

(b) *P. helioscopus varius* II

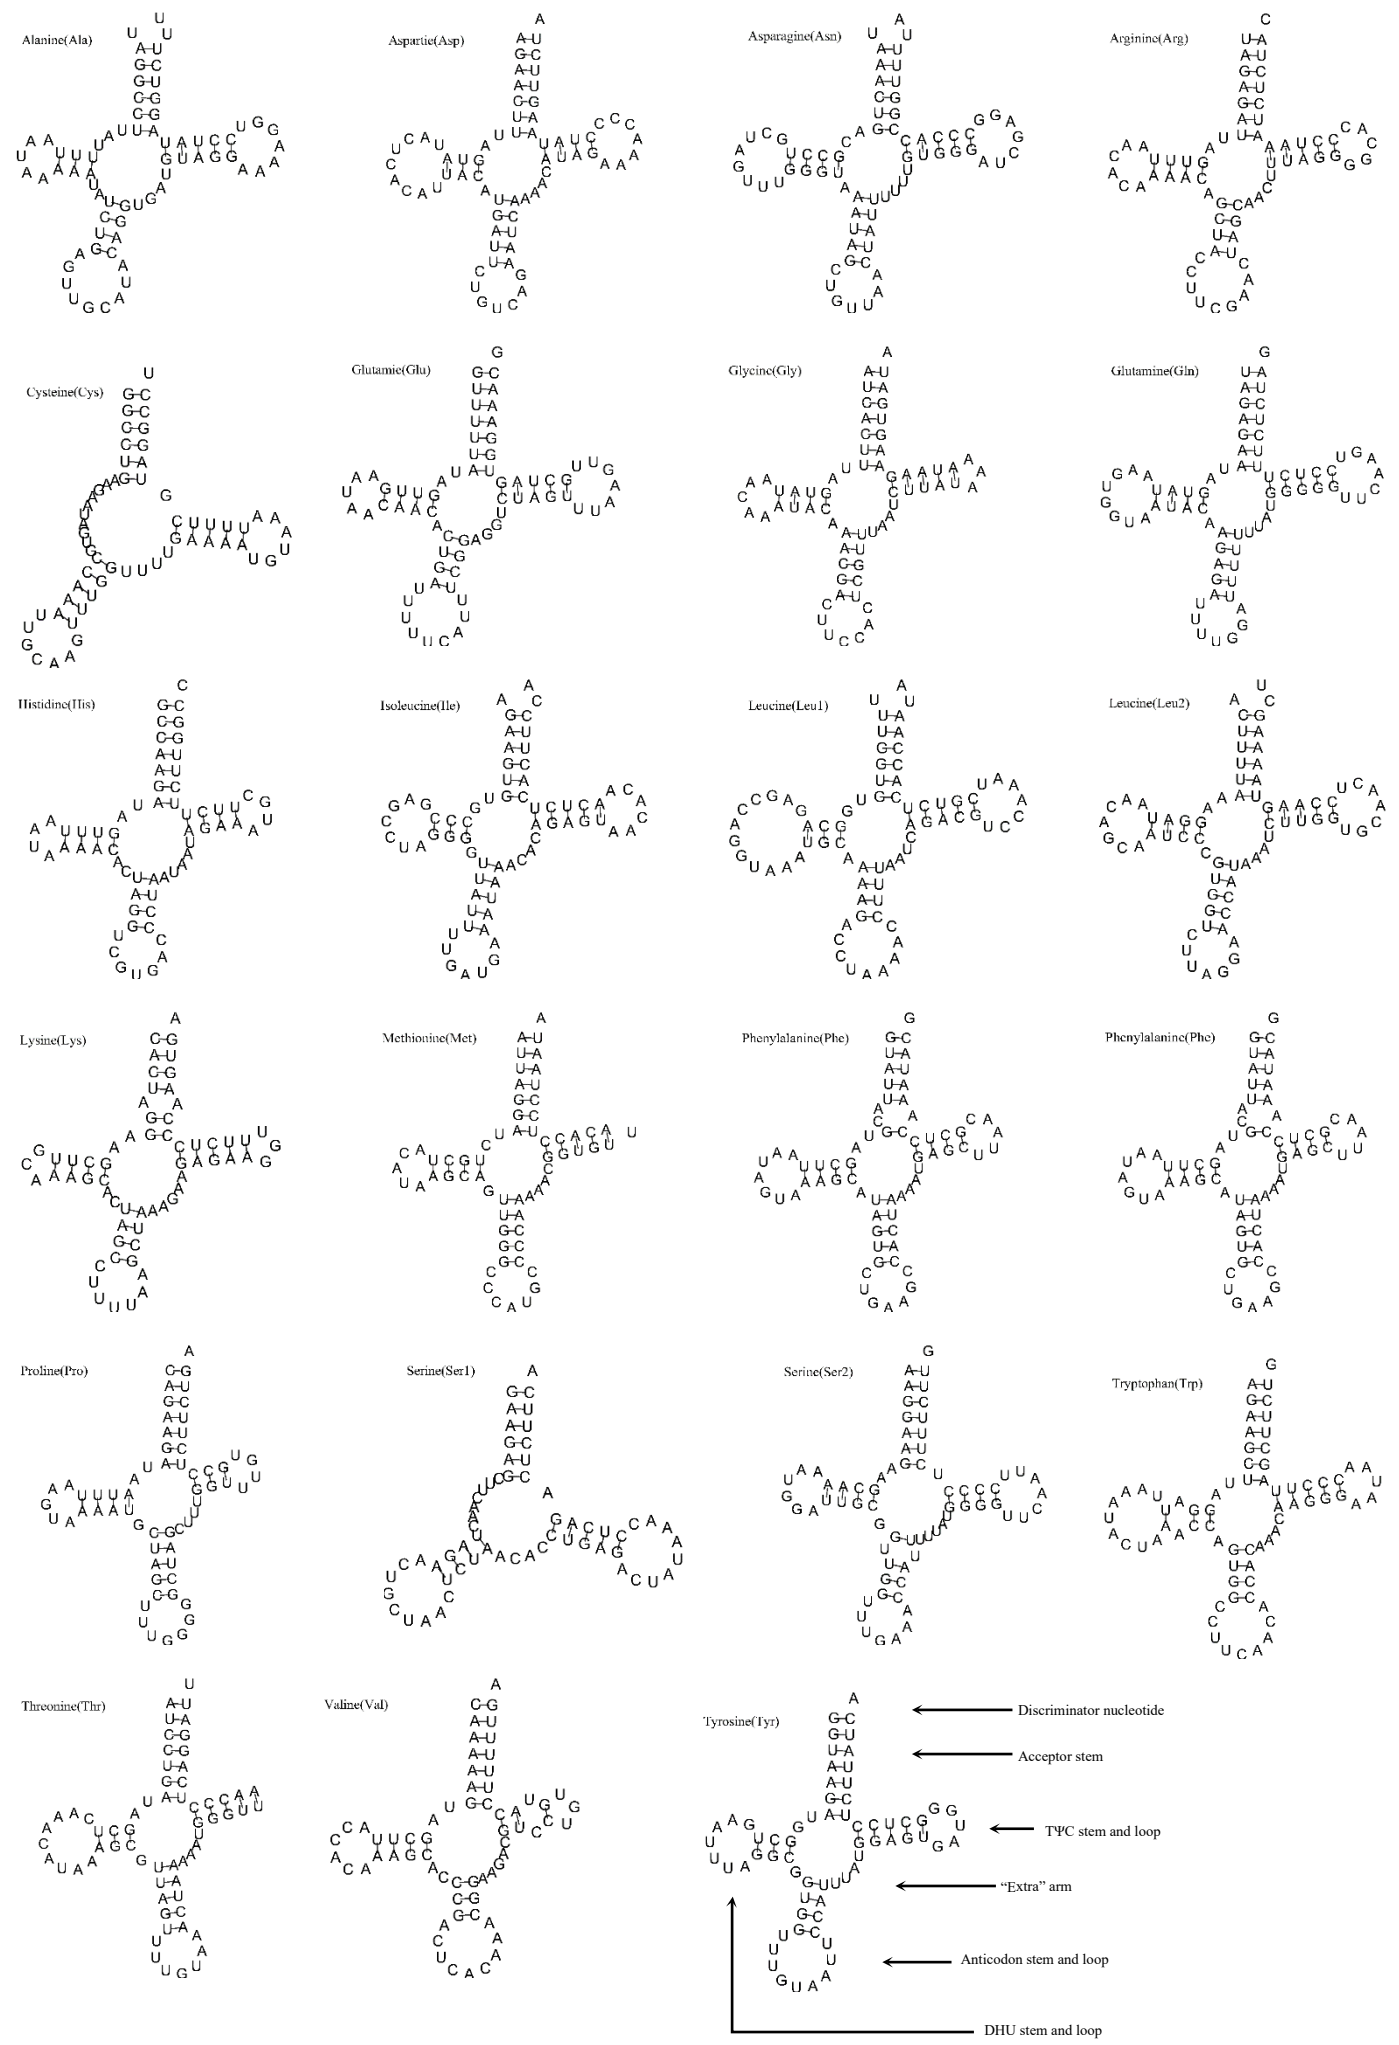

(c) *P. helioscopus cameranoi*

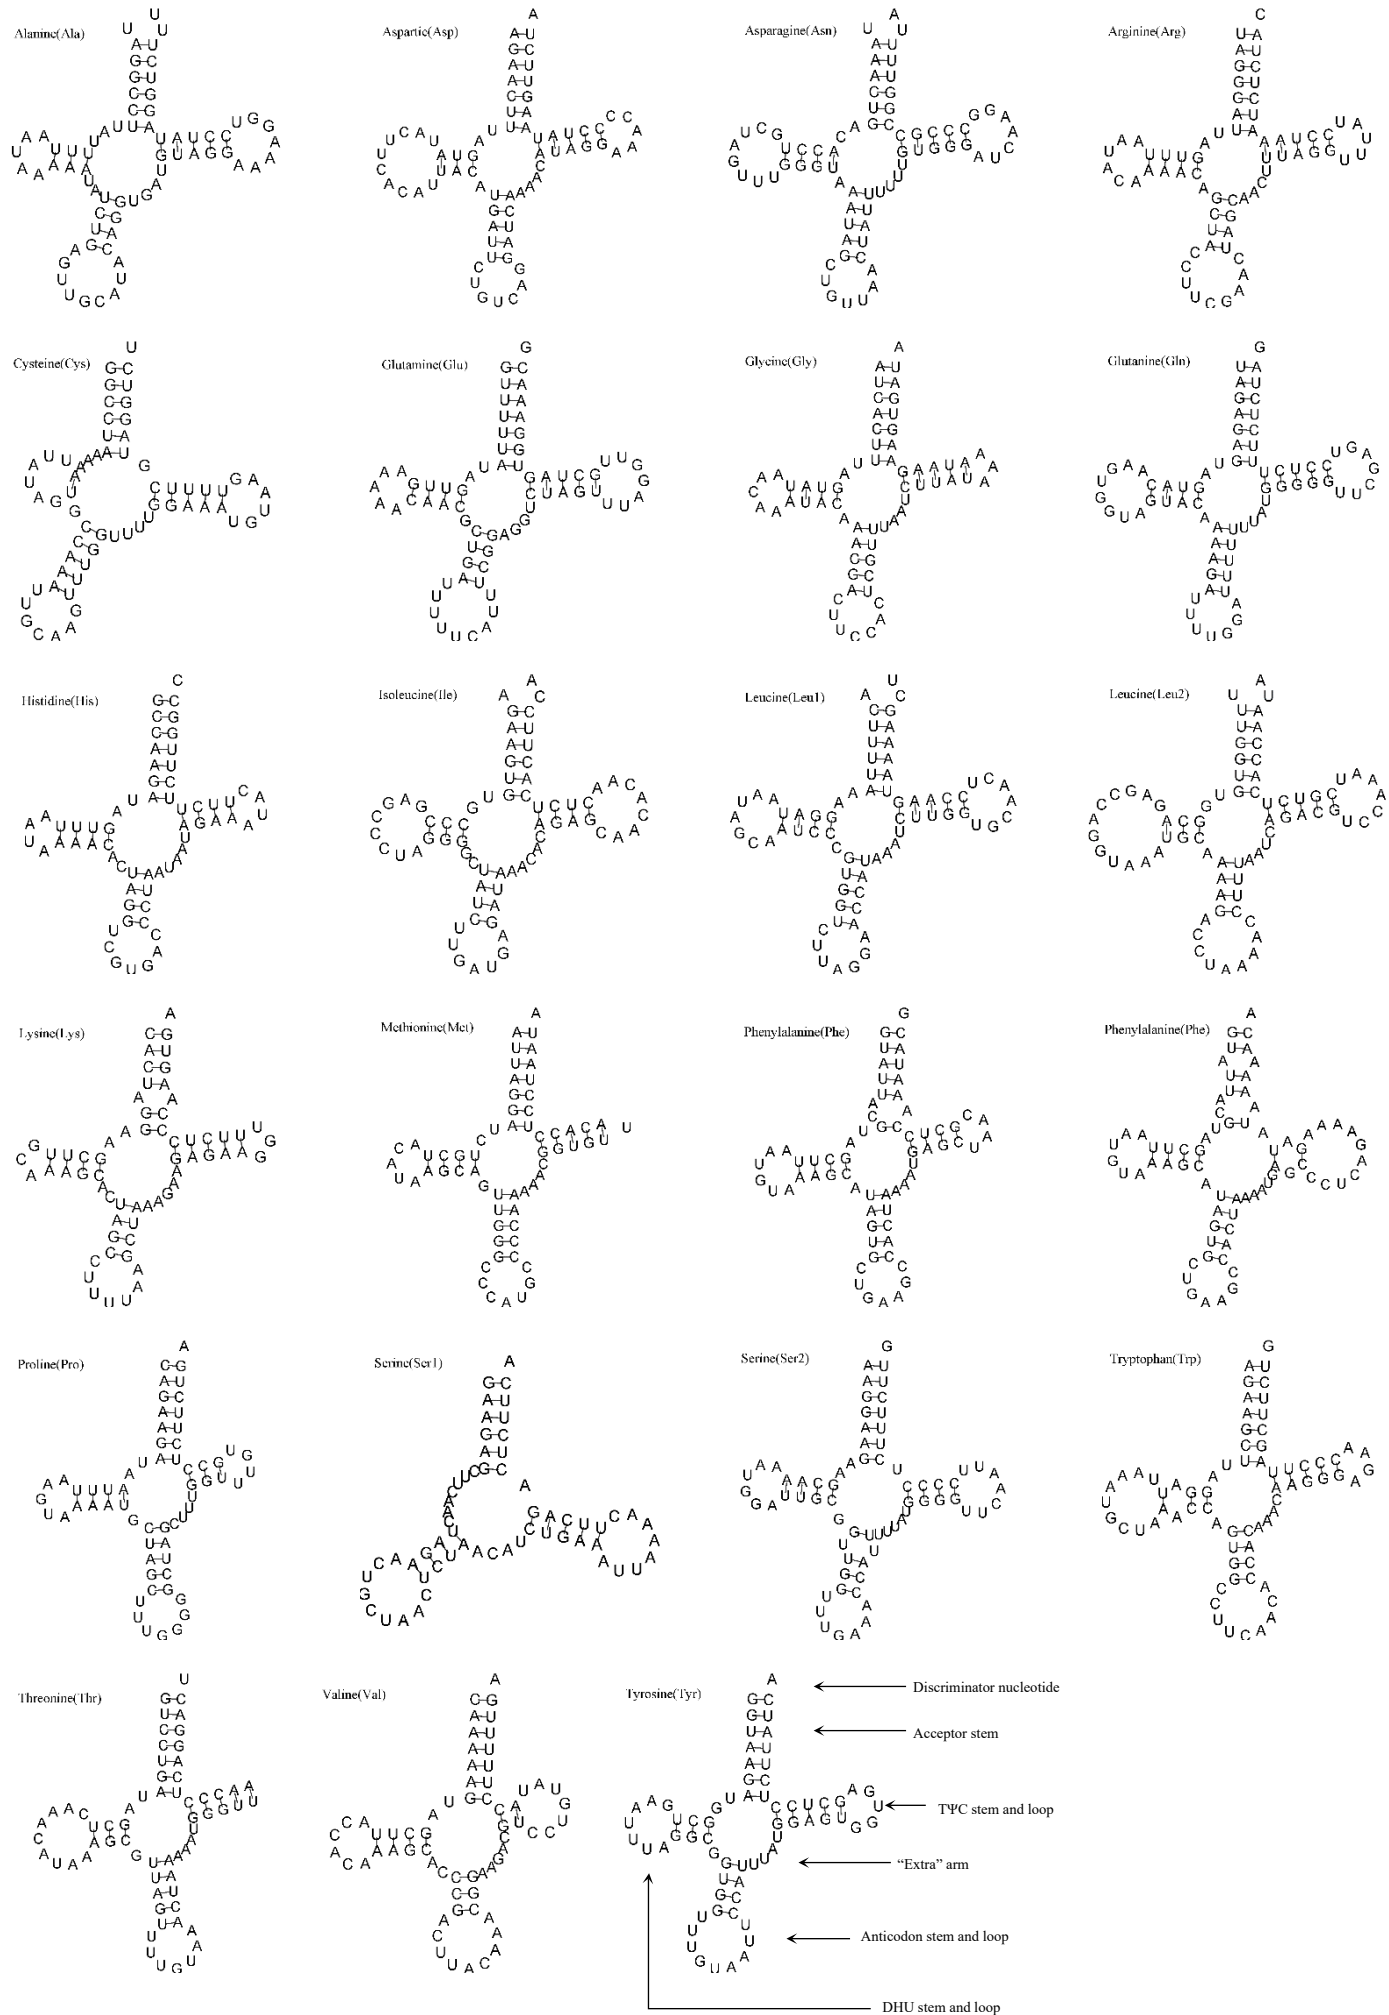

Supplement: s1 [file s1]
